# Supplementary material for: Characterization of the blood and neutrophil‐specific microbiomes and exploration of potential bacterial biomarkers for sepsis in surgical patients
Source: PubMed Central journal article supplement (PMC8589375; doi:10.1002/iid3.483), 2021-07-20
Supplement: IID3-9-1343-s001.pdf [file IID3-9-1343-s001.pdf]

## Supplementary Figures

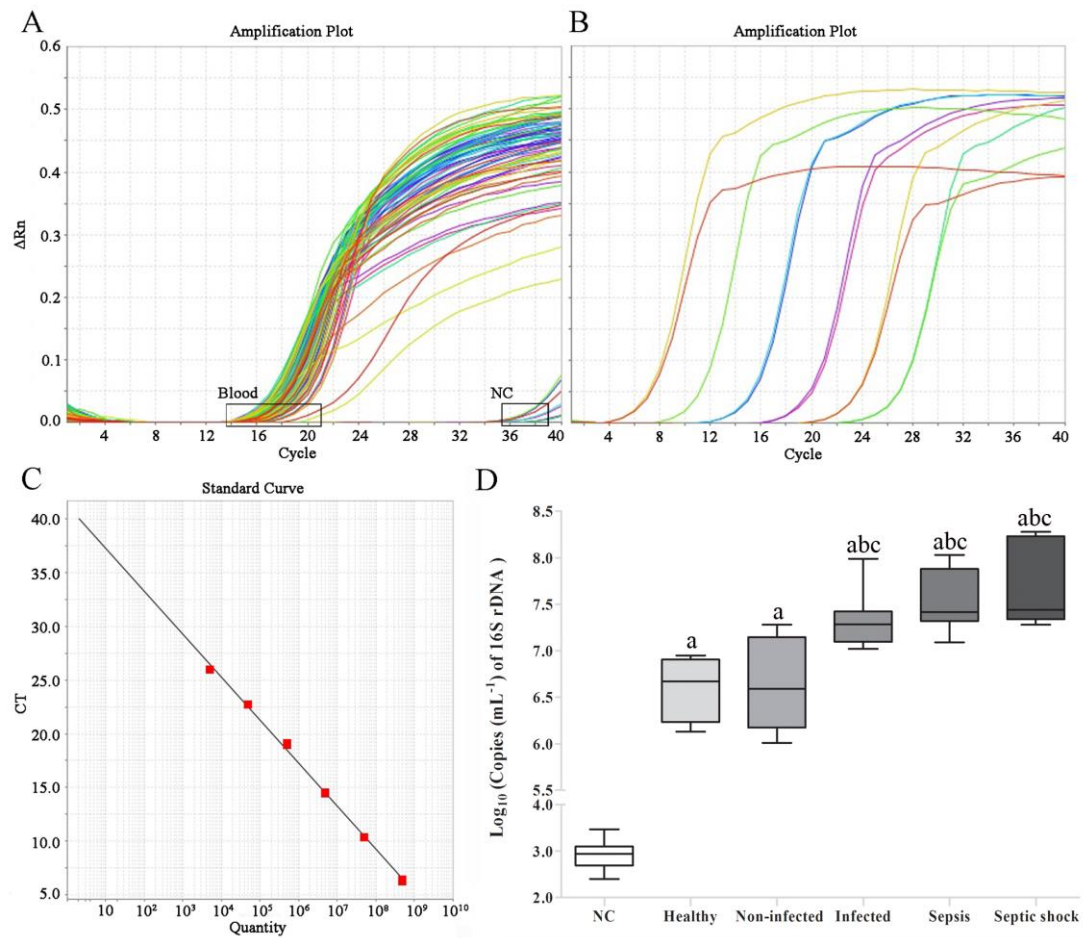

**Figure S1.** Determination of the bacterial 16S rDNA in blood samples by quantitative polymerase chain reaction (qPCR) assay. **A**, Amplification plots of qPCR obtained from blood samples and negative controls (NC). The assays were performed on the AB7500 real time PCR system (Life Technologies, CA). **B**, Amplification plots generating from a series of 10-fold dilutions from  $5 \times 10^3$  to  $5 \times 10^8$  of 16S rRNA gene copies per reaction. **C**, Standard curve generating from the standard dilutions. **D**, Comparison of the bacterial 16S rDNA concentrations in blood samples between patients and healthy controls (HC). The NC indicates the background signal from the reagents and consumables. a:  $p < 0.001$ , vs. NC; b:  $p < 0.01$ , vs. Healthy; c:  $p < 0.01$ , vs. Non-infected.

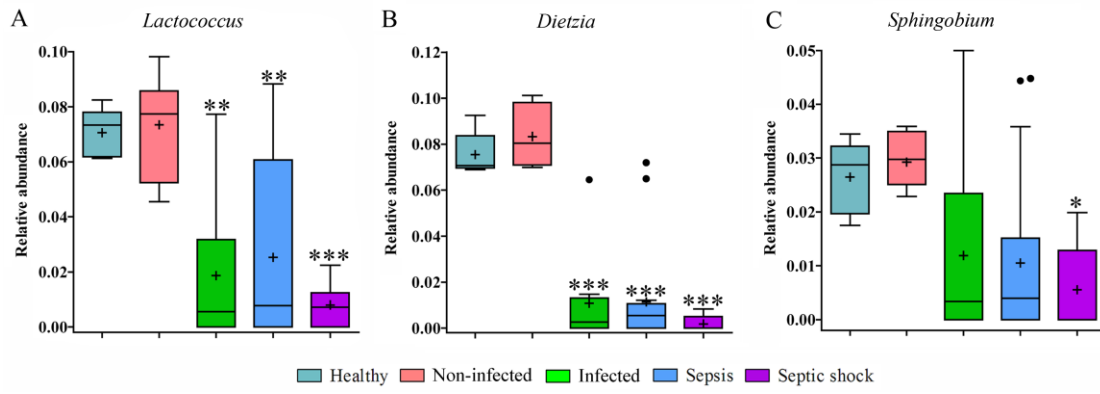

**Figure S2.** The blood bacterial genera showing significant reduction in their relative abundance in septic patients. \*  $p < 0.05$ , \*\*  $p < 0.01$ , \*\*\*  $p < 0.001$ , vs. Healthy.

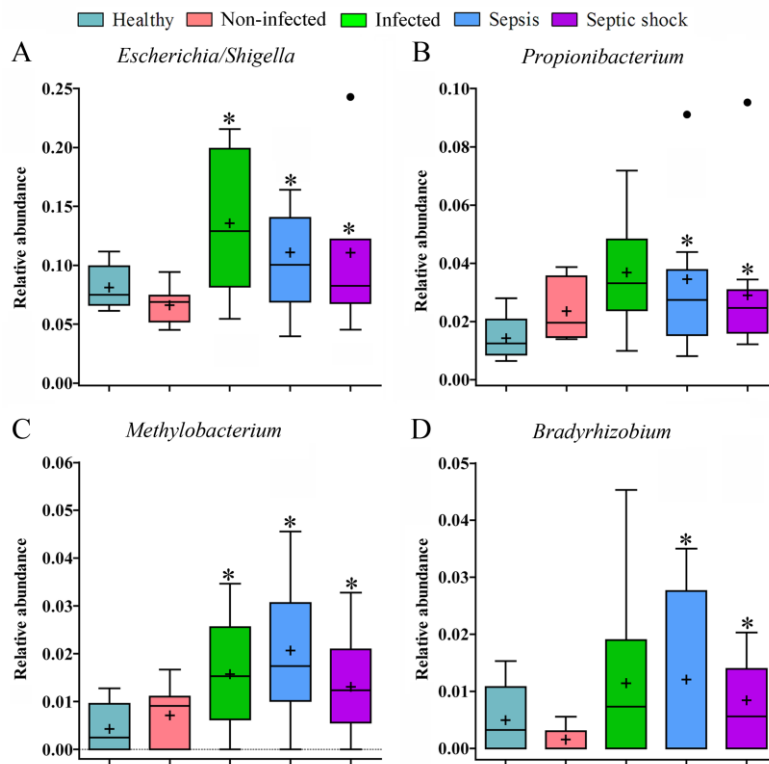

**Figure S3.** The blood bacterial genera showing significant enriched in septic patients. \*  $p < 0.05$ , vs. Healthy.

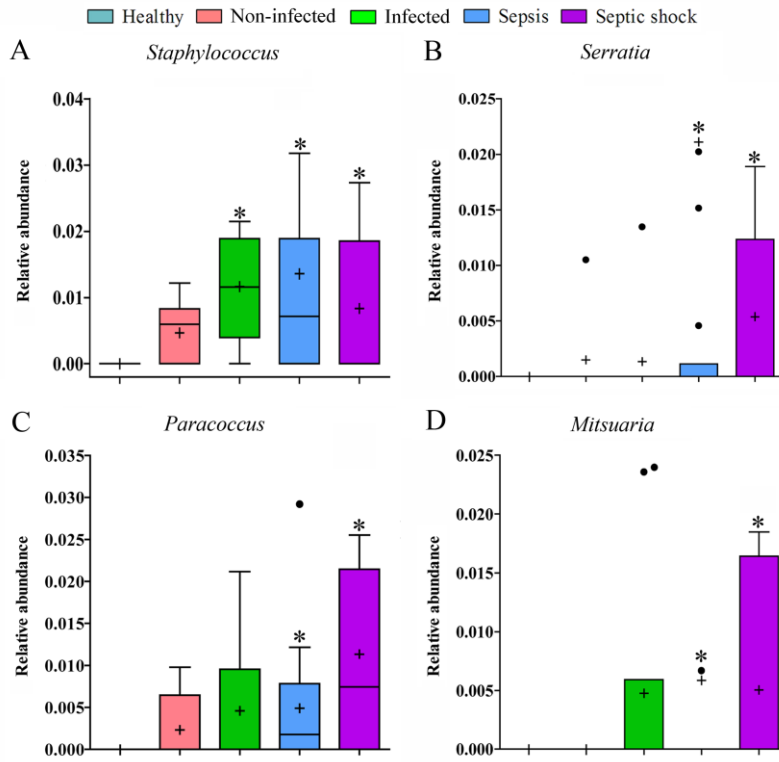

**Figure S4.** The blood bacterial genera presented in septic patients while absent in healthy individuals.

\*  $p < 0.05$ , vs. Healthy.

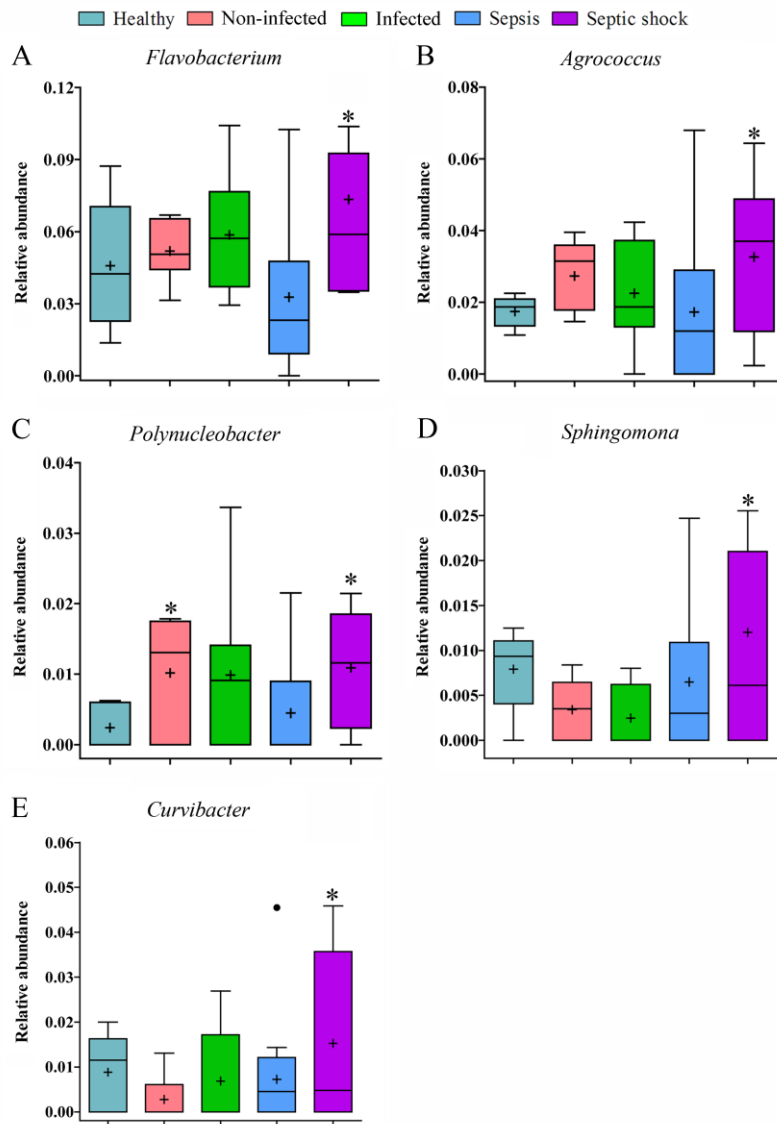

**Figure S5.** The blood bacterial genera significantly enriched in patients with septic shock. \*  $p < 0.05$ , vs. Healthy.

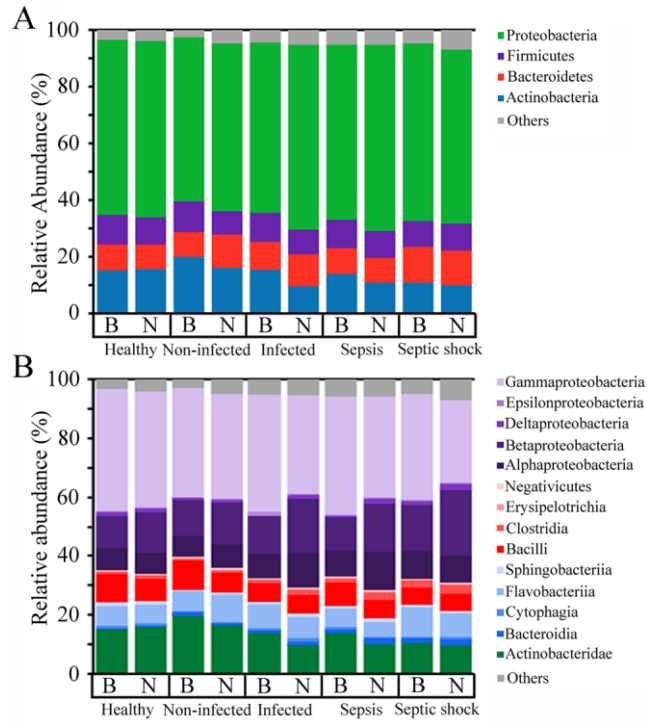

**Figure S6.** Bacterial composition of the blood and neutrophil-specific microbiotas. **(A)** Comparative analyses at the phylum level. **(B)** Comparative analyses at class level. The letters “B” and “N” represent the blood and neutrophil-specific microbiome, respectively.

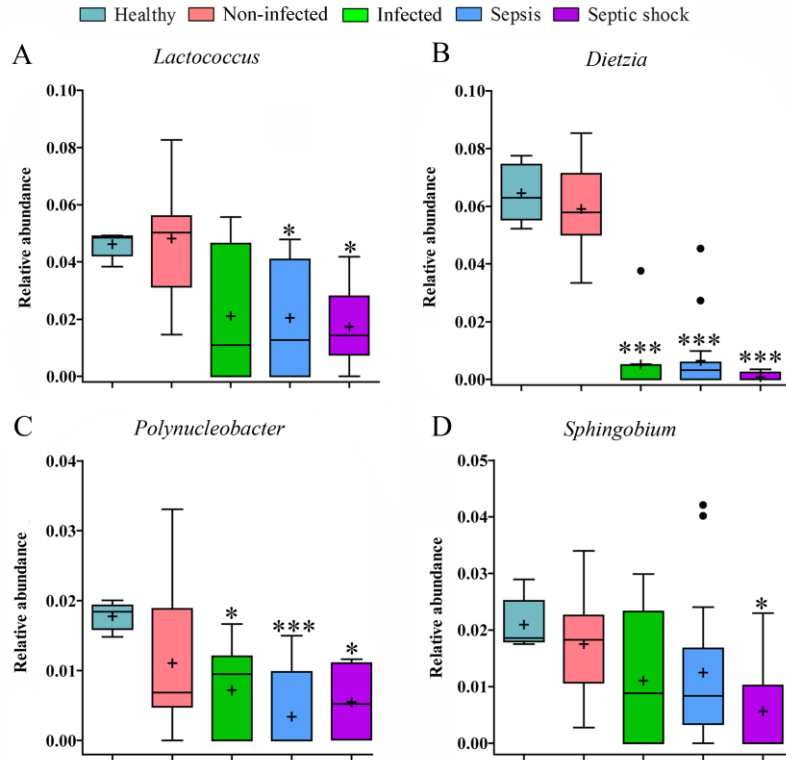

**Figure S7.** The predominant bacterial genera markedly declined in the neutrophils of septic patients. \*  $p < 0.05$ , \*\*\*  $p < 0.001$ , vs. Healthy.

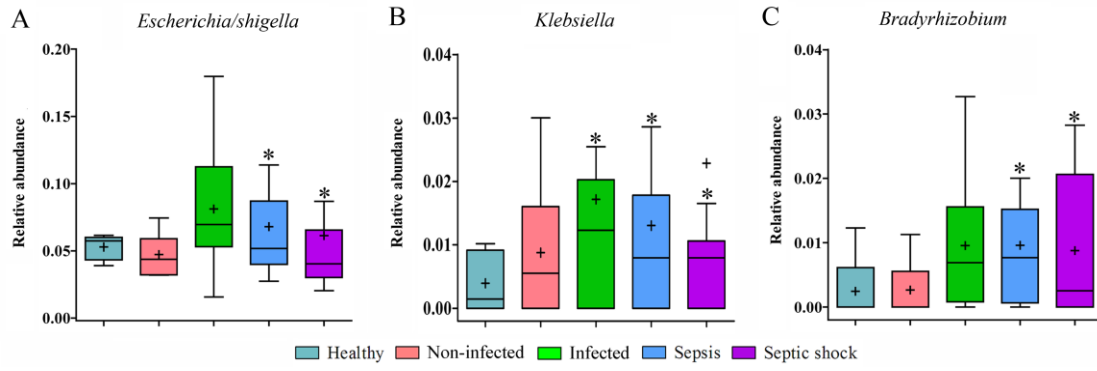

**Figure S8.** The predominant bacterial genera significantly enriched in the neutrophils of septic patients.

\*  $p < 0.05$ , vs. Healthy.



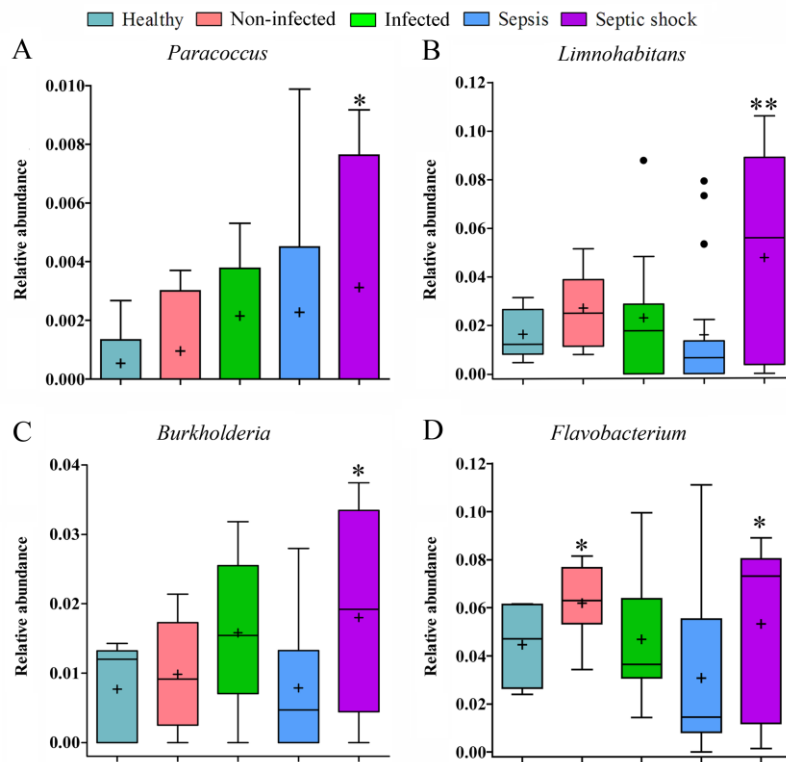

**Figure S9.** The bacterial genera significantly enriched in the neutrophils of patients with septic shock.

\*  $p < 0.05$ , vs. Healthy subjects.

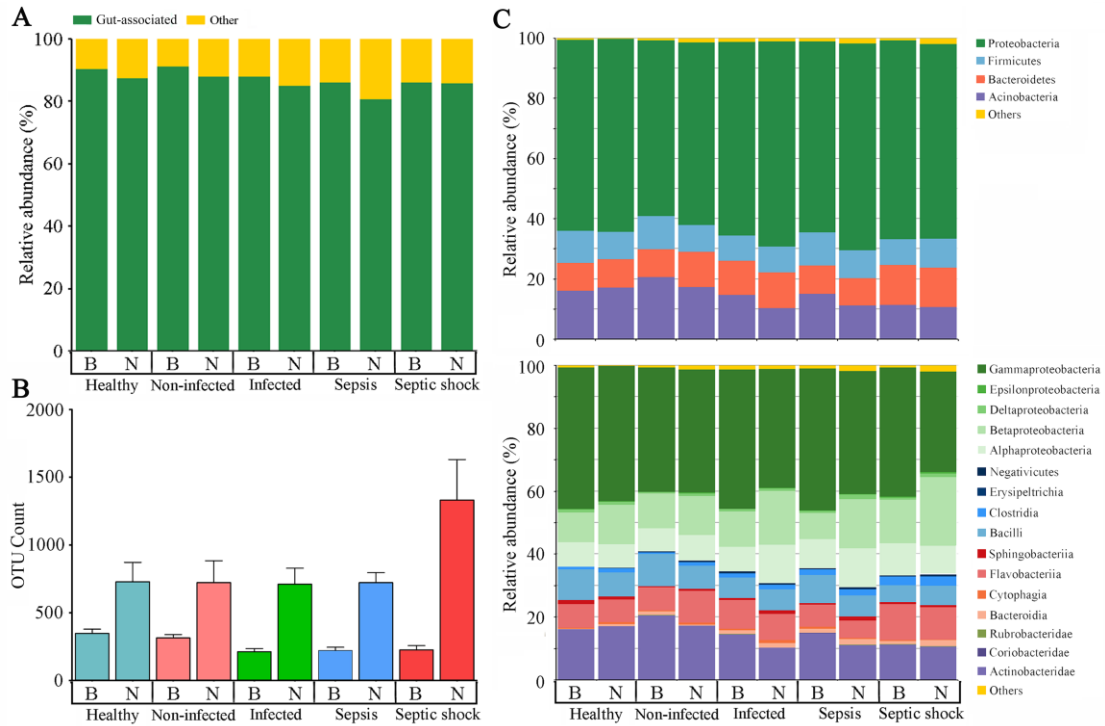

**Figure S10.** The gut-associated bacterial taxa in the blood and neutrophil-specific microbiomes. **(A)** The relative proportions of the gut-associated bacteria in the blood and neutrophil-specific microbiotas. **(B)** The counts of operational taxonomic units (OTUs) (97% identity) classified into gut-associated bacteria. **(C)** Comparative analyses of the gut-associated bacterial communities at the phylum and class levels. The letters “B” and “N” represent the blood and neutrophil-specific microbiome, respectively.
